# Supplementary material for: Sinomenine Hydrochloride Promotes TSHR-Dependent Redifferentiation in Papillary Thyroid Cancer
Source: MDPI journal article supplement (doi:10.3390/ijms231810709), 2022-09-14
Supplement: s1 [file s1]

**Table S1.** Primer sequences used in this study.

| Gene  | Forward (5'-3')          | Reverse (5'-3')          |
|-------|--------------------------|--------------------------|
| NIS   | TATCGCTATGGCCTCAAGTTCCTC | CTCCAGGTACTCGTAGGTGCTGGT |
| TG    | CTGGCTGAGACAGGTTTGGA     | GACTGATTGAACTGCGAGGAA    |
| TPO   | GGAGTCTCGTGTCTCTAGCGT    | CTCTGCATCGTGGCGTACAT     |
| TSHR  | GGAATGGGGTGTTCTGTCTCC    | GCGTTGAATATCCTTGCAGGT    |
| PAX8  | TACTCTGGCAATGCCTATGG     | TACAGATGGTCAAAGGCCG      |
| GAPDH | CACTAGGCGCTCACTGTTCT     | GCGCCCAATACGACCAAATC     |
