# Supplementary material for: Sinomenine Hydrochloride Promotes TSHR-Dependent Redifferentiation in Papillary Thyroid Cancer
Source: MDPI journal article supplement (doi:10.3390/ijms231810709), 2022-09-14
Supplement: s1 [file s1]

**BCPAP**

NIS

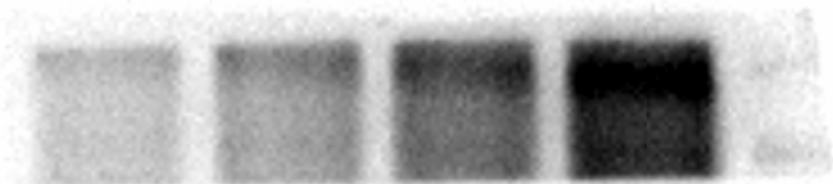

GAPDH

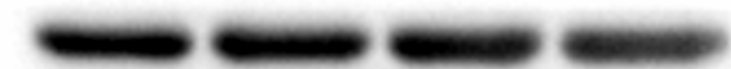

SH

0mM      2mM      4mM      6mM

**TPC-1**

NIS

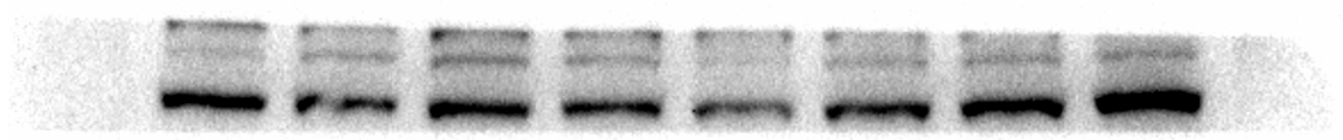

GAPDH

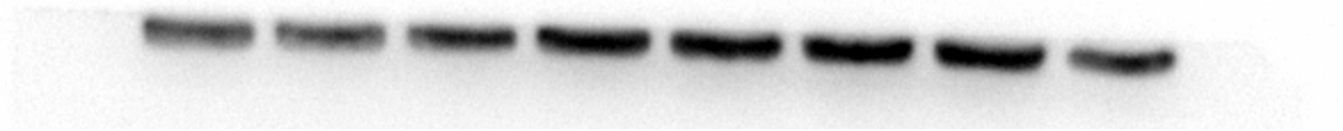

0mM    2mM    4mM    6mM    SH

BCPAP

NIS

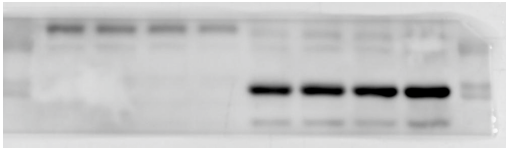

ATP

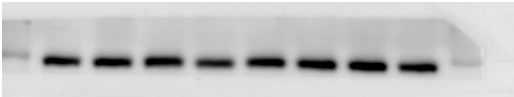

0 2 4 6 SH(mM)

NIS

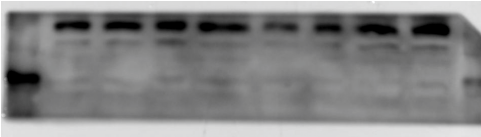

GAPD  
H

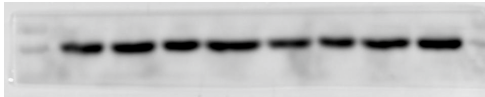

0 2 4 6 SH (mM)

TPC-1

NIS

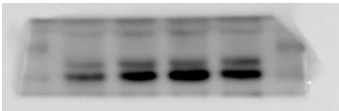

ATP

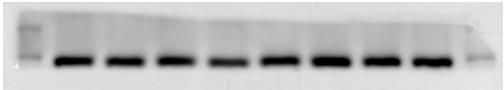

0 2 4 6 SH (mM)

NIS

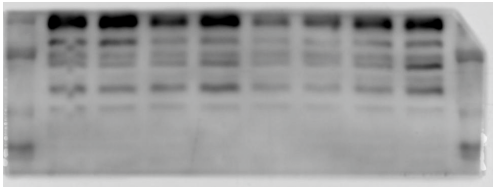

GAPD  
H

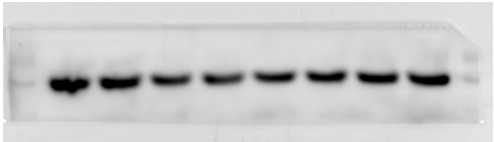

0 2 4 6 SH (mM)

BCPAP

TSHR

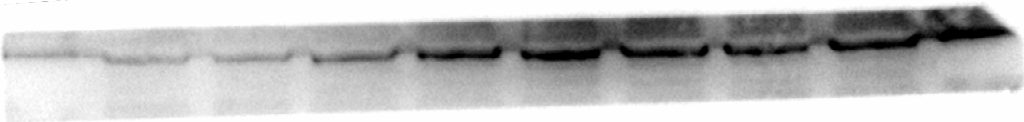

cAMP

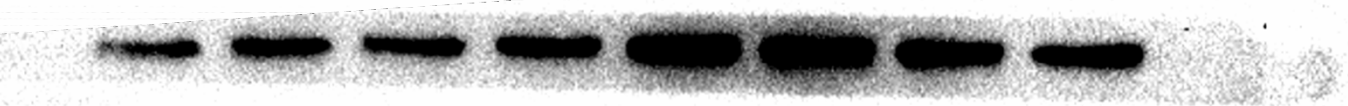

pCREB  
(ser133)

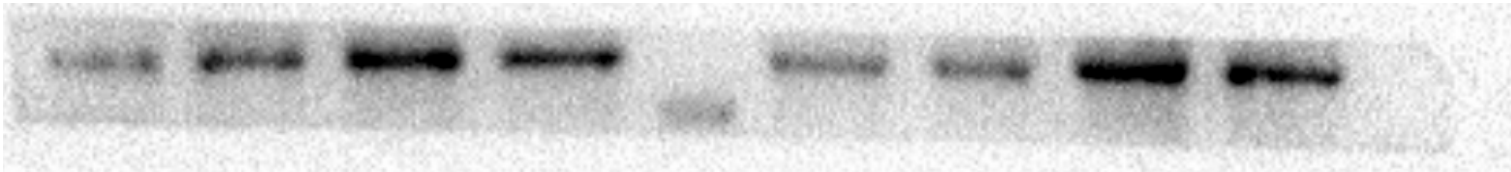

PAX8

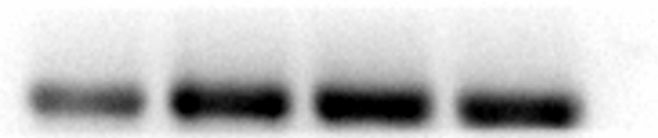

GAPDH

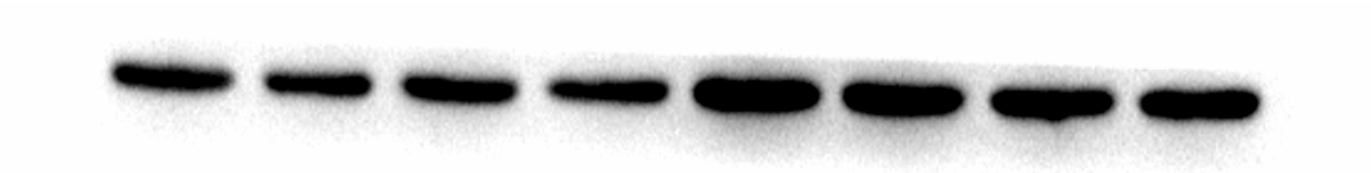

SH

0mM    2mM    4mM    6mM

TPC-1

TSHR

cAMP

pCREB  
(ser133)

PAX8

GAPDH

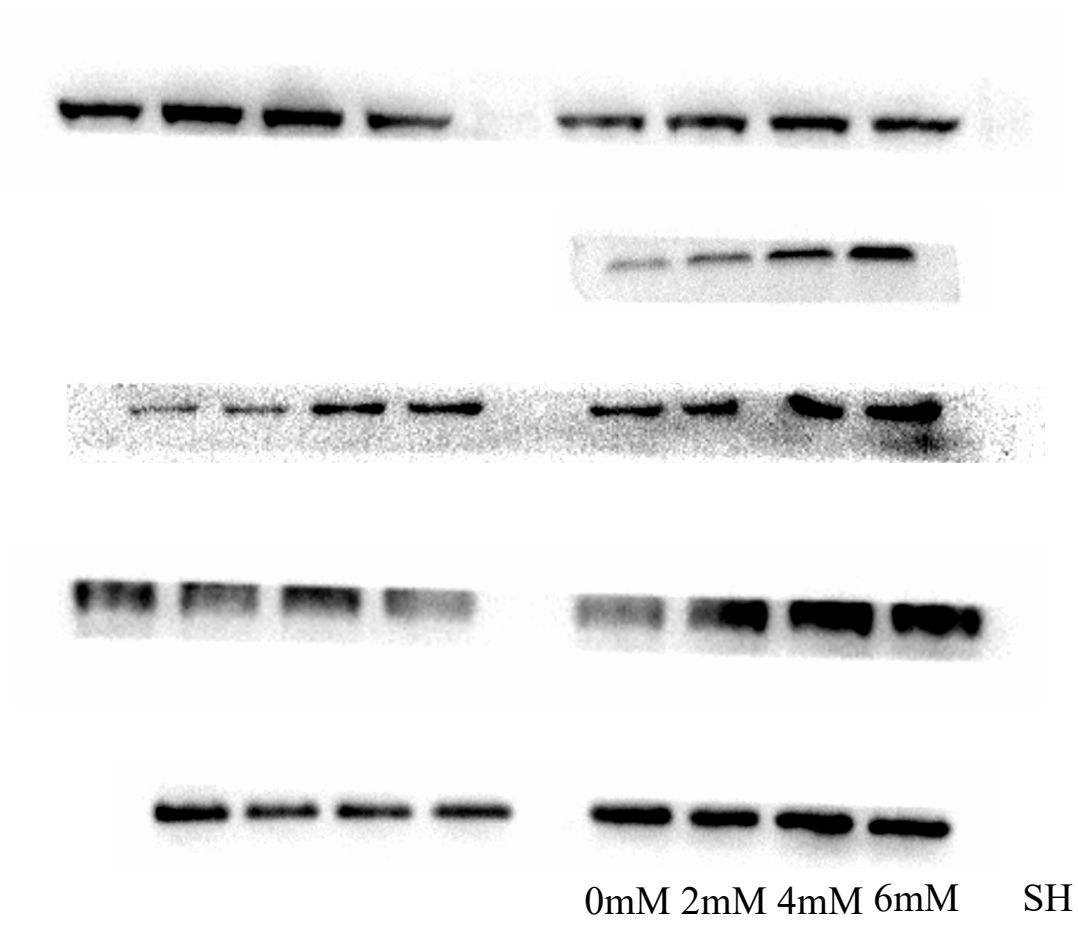

BCPAP

cAMP

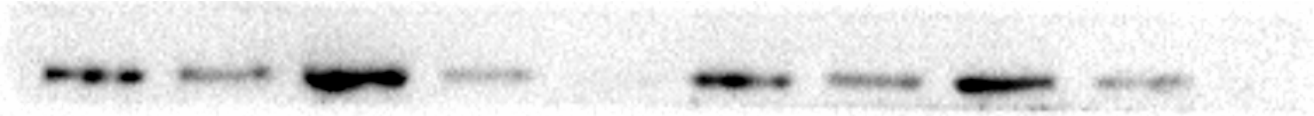

pCREB  
(ser133)

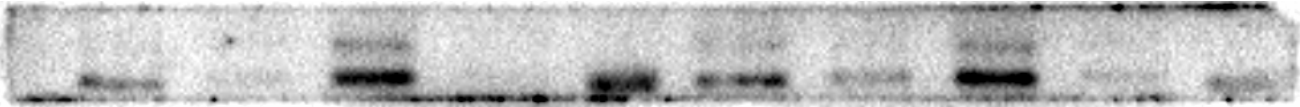

PAX8

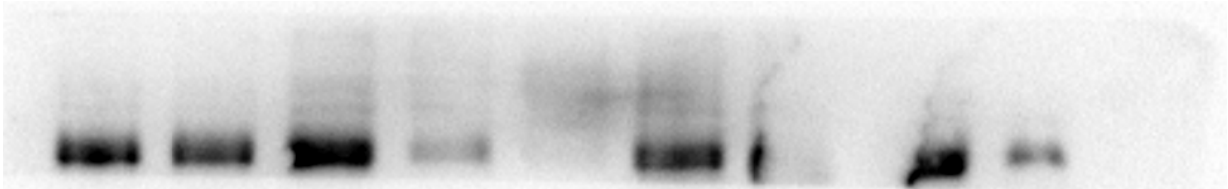

NIS

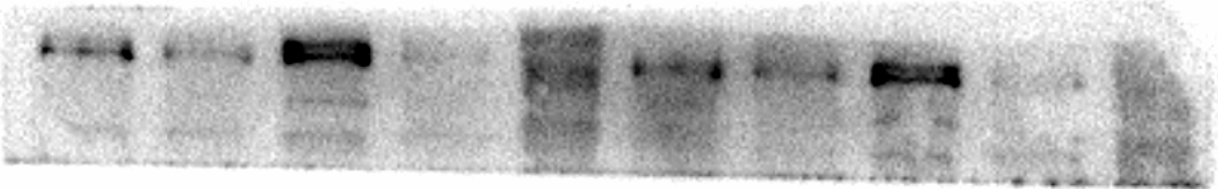

GAPDH

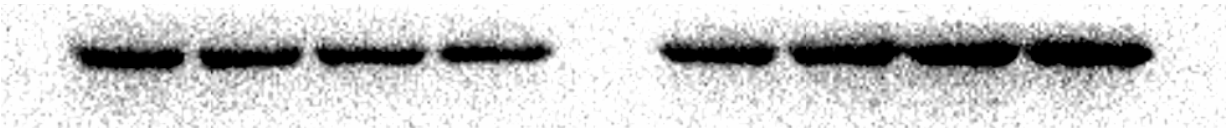

|         |   |   |   |   |
|---------|---|---|---|---|
| SH      | - | - | + | + |
| SQ22536 | - | + | - | + |

TPC-1

cAMP

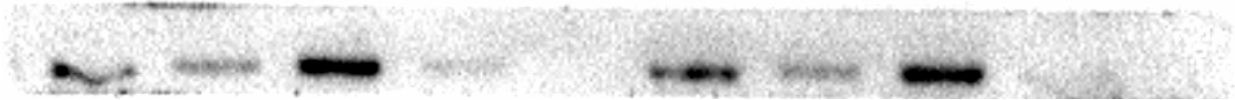

pCREB  
(ser133)

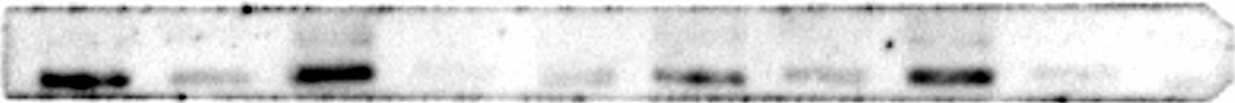

PAX8

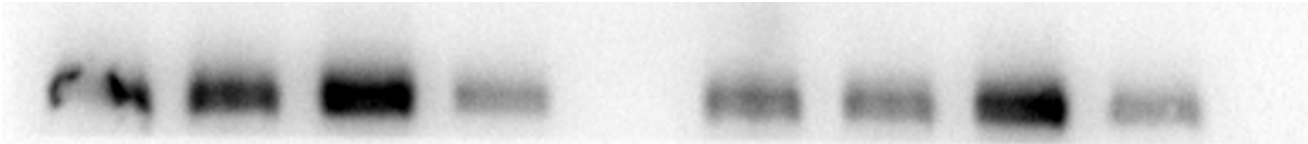

NIS

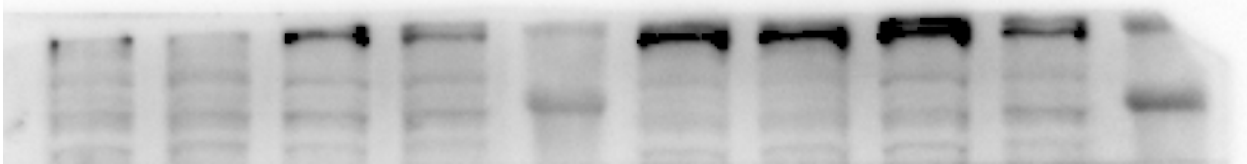

GAPDH

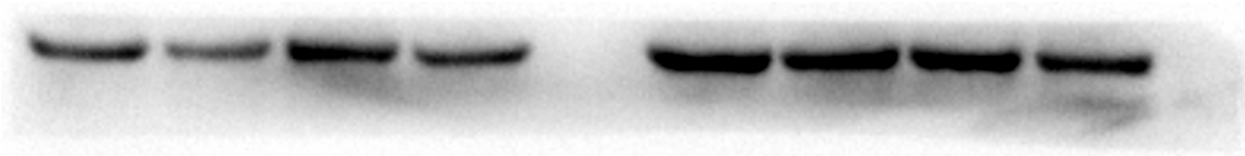

|   |   |   |   |         |
|---|---|---|---|---------|
| - | - | + | + | SH      |
| - | + | - | + | SQ22536 |
